# Supplementary material for: Beneficial Effects of Insulin on Glycemic Control and β-Cell Function in Newly Diagnosed Type 2 Diabetes With Severe Hyperglycemia After Short-Term Intensive Insulin Therapy
Source: Oxford University Press journal article supplement (doi:10.2337/dc08-0075), 2008-06-13
Supplement: dc080075-sup-apendix_figure-study_design.doc [file dc080075-sup-apendix_figure-study_design.doc]

**Figure 1. Design of the study**

Newly diagnosed type 2 diabetes with severe hyperglycemia

(n=60)

Intensive insulin therapy

for 10-14 days

Randomized (n=50)

Randomized to insulin (n=30)

Randomized to OAD (n=20)

Allocated to insulin (n=25)

Allocated to OAD (n=19)

24 patients completed

6 months of the study

18 patients completed

6 months of the study

Excluded because of:

1. Stimulated C-peptide <2.0 ng/dL (n=5)
2. Serum creatinine >2.0 mg/dL (n=2)
3. Active liver disease (n=3)

Refused further insulin injection (n=5)

Refused participate this study (n=1)

19 patients completed

12 months of the study

16 patients completed

12 months of the study
